# Supplementary material for: ErbB4 deletion in noradrenergic neurons in the locus coeruleus induces mania-like behavior via elevated catecholamines
Source: eLife. 2018 Sep 4;7:e39907. doi: 10.7554/eLife.39907 (PMC6185106; doi:10.7554/eLife.39907)
Supplement: Figure 1—source data 1. [file elife-39907-fig1-data1.xlsx]

## Sheet: Table S3
Figure 1-Source data 1: Statistical reporting of Figure 1
Assay	Measurement	N	Values (mean±s.e.m.)	Statistical test and P value		Figure
Figure 1	ErbB4 density in LC	control=4	1.00 ± 0.08486	Unpaired two-tailed Student's t-test, P=0.0057		Fig. 1E
ErbB4 protein	Normalized	TG=4	0.4393± 0.10287
	ErbB4 density in midbrain	control=4	1.00 ± 0.23847	Unpaired two-tailed Student's t-test, P=9805		Fig. 1E
	Normalized	TG=4	1.0149 ± 0.33164
Figure 1	ErbB4 fluorescent intensity	control=13	1 ±0.03334	Unpaired two-tailed Student's t-test, P=1.47191E-7		Fig. 1G
ErbB4 fluorescent intensity	Normalized	TG=11	0.66952 ± 0.0264
Fig. 1-fig. supplement 3	Cell desity (/10,000 μm2 )	Male control=9	13.44444 ± 1.00154	Unpaired two-tailed Student's t-test, P=0.8832		Fig. 1-fig. supplement 3B
Cell desity		Male TG=8	13.25 ± 0.7962
Fig. 1-fig. supplement 3	Soma size （μm2）	Male control=10	321.5003 ± 12.03307	Unpaired two-tailed Student's t-test, P=0.8412		Fig. 1-fig. supplement 3C
Soma size		Male TG=11	325.19382 ± 13.44559
