# Supplementary material for: ErbB4 deletion in noradrenergic neurons in the locus coeruleus induces mania-like behavior via elevated catecholamines
Source: eLife. 2018 Sep 4;7:e39907. doi: 10.7554/eLife.39907 (PMC6185106; doi:10.7554/eLife.39907)
Supplement: Figure 2—source data 1. [file elife-39907-fig2-data1.xlsx]

## Sheet: Table S3
Figure 2-Source data 1: Statistical reporting of Figure 2
Assay	Measurement	N	Values (mean±s.e.m.)	Statistical test and P value		Figure
Figure 2	Spontaneous fring frequency	control=10	1.9383 ± 0.1787	Unpaired two-tailed Student's t-test, P=0.0024		Fig. 2C
Spontaneous activity		TG=8	2.8625 ± 0.1798
	Interspike intervel	control=10		Two-sample Kolmogorov–Smirnov test, P=3.30114E-124		Fig. 2D
		TG=8
Figure 2	TH-Ser40/TH	control=4	1.00 ± 0.08847	Unpaired two-tailed Student's t-test, P=0.0326		Fig. 2F
LC	Normalized	TG=4	1.35447 ± 0.08406
	TH	control=4	1.00 ± 0.05747	Unpaired two-tailed Student's t-test, P=0.2434		Fig. 2F
	Normalized	TG=4	1.08351 ± 0.07355
	s-COMT	control=4	1.00 ±0.1437	Unpaired two-tailed Student's t-test, P=0.784		Fig. 2F
	Normalized	TG=4	1.19852 ± 0.13121
	MB-COMT	control=4	1.00 ± 0.14888	Unpaired two-tailed Student's t-test, P=0.347		Fig. 2F
	Normalized	TG=4	1.05743 ± 0.14107
	NET	control=4	1.00 ± 0.07974	Unpaired two-tailed Student's t-test, P=0.7343		Fig. 2F
	Normalized	TG=4	1.05919 ± 0.14611
	DBH	control=4	1.00 ± 0.14415	Unpaired two-tailed Student's t-test, P=0.5802		Fig. 2F
	Normalized	TG=4	0.90368 ± 0.07987
Figure 2	TH-Ser40/TH	control=4	1.00 ± 0.1729	Unpaired two-tailed Student's t-test, P=0.8196		Fig. 2H
midbrain	Normalized	TG=4	0.97388 ± 0.19926
	TH	control=4	1.00 ± 0.06082	Unpaired two-tailed Student's t-test, P=0.7894		Fig. 2H
	Normalized	TG=4	1.0298 ± 0.08764
	s-COMT	control=4	1.00 ± 0.05889	Unpaired two-tailed Student's t-test, P=8941		Fig. 2H
	Normalized	TG=4	1.01367 ±0.07882
	MB-COMT	control=4	1.00 ± 0.16711	Unpaired two-tailed Student's t-test, P=9591		Fig. 2H
	Normalized	TG=4	0.9855 ±0.21348
	NET	control=4	1.00 ± 0.04603	Unpaired two-tailed Student's t-test, P=8392		Fig. 2H
	Normalized	TG=4	0.96438 ± 0.16165
	DBH	control=4	1.00 ±0.04346	Unpaired two-tailed Student's t-test, P=3850		Fig. 2H
	Normalized	TG=4	1.09532 ± 0.092
Concentration of NE	Norepinephrine	control=6	100 ± 26.27691	Unpaired two-tailed Student's t-test, P=0.034		Fig. 2I
and DA in the	Normalized	TG=6	620.31654 ± 205.23478
cerebrospinal fluid	Dopamine	control=6	100 ± 28.75829	Unpaired two-tailed Student's t-test, P=0.0266		Fig. 2J
	Normalized	TG=6	387.89784 ± 102.18752
