# Supplementary material for: ErbB4 deletion in noradrenergic neurons in the locus coeruleus induces mania-like behavior via elevated catecholamines
Source: eLife. 2018 Sep 4;7:e39907. doi: 10.7554/eLife.39907 (PMC6185106; doi:10.7554/eLife.39907)
Supplement: Figure 3—source data 1. [file elife-39907-fig3-data1.xlsx]

## Sheet: Table S3
Figure 3-Source data 1: Statistical reporting of Figure 3
Assay	Measurement	N	Values (mean±s.e.m.)	Statistical test and P value		Figure
Figure 3	NR2B	control=3	1.00±0.111026	Unpaired two-tailed Student's t-test, P=0.0362		Fig. 3B
LC	Normalized	TG=3	1.471345±0.104004
	NR2A	control=6	1±0.06945	Unpaired two-tailed Student's t-test, P=0.33137		Fig. 3B
	Normalized	TG=6	0.87027±0.10642
	NR1	control=3	1.00±0.069925	Unpaired two-tailed Student's t-test, P=8931		Fig. 3B
	Normalized	TG=3	1.015865±0.086087
	A2A	control=3	1.00±0.157023	Unpaired two-tailed Student's t-test, P=0.8171		Fig. 3B
	Normalized	TG=3	0.952669±0.110032
	A2C	control=3	1.00±0.208252	Unpaired two-tailed Student's t-test, P=0.6515		Fig. 3B
	Normalized	TG=3	1.106556±0.0667
Figure 3	Amplitude of NMDAR current	control=7	1±0.31861	Unpaired two-tailed Student's t-test, P=0.02274		Fig. 3D
NMDAR current	Normalized	TG=8	2.15737±0.31288
Figure 3	Spontaneous fring frequency after APV treatment	TG =11	3.04609 ± 0.26031	Unpaired two-tailed Student's t-test, P=3.4063E-5		Fig. 3F
Spontaneous activity	Normalized	TG APV=20	1.60945 ± 0.16449
APV		control=13	2.0601 ± 0.2585	Unpaired two-tailed Student's t-test, P=0.11811		Fig. 3F
		control APV=13	1.57909 ± 0.14575
	Interspike intervel after APV treatment	TG =11		Two-sample Kolmogorov–Smirnov test, P=0		Fig. 3G
	Normalized	TG APV=20
		control=13		Two-sample Kolmogorov–Smirnov test, P=7.95767E-135		Fig. 3G
		control APV=13
Fig. 3-fig. supplement 1	Amplitude	control=10	22.64038 ± 1.38948	Unpaired two-tailed Student's t-test, P=0.84957		Fig. 3-fig. supplement 1B
AMPA-sEPSC		TG=9	22.22233±1.6904
Fig. 3-fig. supplement 1	Frequency	control=8	1.53542 ± 0.27578	Unpaired two-tailed Student's t-test, P=0.47976		Fig. 3-fig. supplement 1C
AMPA-sEPSC		TG=10	1.28833 ± 0.21167
Fig. 3-fig. supplement 1	Amplitude	control=13	36.96308 ± 2.28281	Unpaired two-tailed Student's t-test, P=0.10049		Fig. 3-fig. supplement 1E
sIPSC		TG=11	31.10129 ± 2.55715
Fig. 3-fig. supplement 1	Frequency	control=13	1.14872± 0.11366	Unpaired two-tailed Student's t-test, P=0.68284		Fig. 3-fig. supplement 1F
sIPSC		TG=11	1.23333± 0.17733
Fig. 3-fig. supplement 2	Threshold	control=6	-23.97156 ± 2.17325	Unpaired two-tailed Student's t-test, P=0.05254		Fig. 3-fig. supplement 2C
Intrinsic membrane properties		TG=8	-30.53284 ± 2.07482
	Rheo-base current	control=11	90.45455 ± 12.80012	Unpaired two-tailed Student's t-test, P=0.85737		Fig. 3-fig. supplement 2D
		TG=10	87 ± 14.04754
	Amplitude	control=6	69.19861 ±3.41157	Unpaired two-tailed Student's t-test, P=0.23633		Fig. 3-fig. supplement 2E
		TG=8	75.10376 ±3.20177
	Half-width	control=6	1.2± 0.03864	Unpaired two-tailed Student's t-test, P=0.12143		Fig. 3-fig. supplement 2F
		TG=8	1.3075 ±0.0475
	AHP	control=6	28.36178 ±1.36427	Unpaired two-tailed Student's t-test, P=0.12398		Fig. 3-fig. supplement 2G
		TG=8	24.65091 ±1.6432
	Rin	control=6	373.91667 ± 36.04775	Unpaired two-tailed Student's t-test, P=0.13708		Fig. 3-fig. supplement 2H
		TG=8	438.6 ± 10.65101
	Cm	control=6	74.71667± 6.01944	Unpaired two-tailed Student's t-test, P=0.44643		Fig. 3-fig. supplement 2I
		TG=8	69.86 ±2.92459
	τm	control=6	36.19571 ±3.22841	Unpaired two-tailed Student's t-test, P=0.92909		Fig. 3-fig. supplement 2J
		TG=8	35.87625 ±1.29202
