# Supplementary material for: ErbB4 deletion in noradrenergic neurons in the locus coeruleus induces mania-like behavior via elevated catecholamines
Source: eLife. 2018 Sep 4;7:e39907. doi: 10.7554/eLife.39907 (PMC6185106; doi:10.7554/eLife.39907)
Supplement: Figure 4—source data 1. [file elife-39907-fig4-data1.xlsx]

## Sheet: Table S3
Figure 4-Source data 1: Statistical reporting of Figure 4
Assay	Measurement	N	Values (mean±s.e.m.)	Statistical test and P value	Post hoc test and P value	Figure
Figure 4	Total distance (cm) traveled	Male control=24	5275.204 ± 151.10	Unpaired two-tailed Student's t-test, P=0.0006		Fig. 4B
Open field		Male TG=22	6307.123 ± 240.82
	Speed (cm/s)	Male control=24	8.79201 ± 0.25184	Unpaired two-tailed Student's t-test, P=0.0006		Fig. 4C
		Male TG=22	10.51187 ± 0.40137
	Distance (cm) traveled with high speed	Male control=14	3384.436 ± 189.483	Unpaired two-tailed Student's t-test, P=0.0087		Fig. 4D
		Male TG=14	4255.35 ± 241.25
	Duration (s) traveled with high speed	Male control=17	166.059 ± 8.775	Unpaired two-tailed Student's t-test, P=0.0095		Fig. 4E
		Male TG=13	204.969 ± 11.126
	Immobile time (s)	Male control=17	106.639 ± 5.431	Unpaired two-tailed Student's t-test, P=0.0001		Fig. 4F
		Male TG=13	73.58 ± 4.837
Figure 4	Time in open arms (%)	Male control=34	100 ±7.09528	Unpaired two-tailed Student's t-test, P=0.0092		Fig. 4H
elevated plus maze		Male TG=24	131.85697 ± 9.83069
	Entries into open arms (%)	Male control=23	100 ± 5.71062	Unpaired two-tailed Student's t-test, P=0.0029		Fig. 4I
		Male TG=22	128.83976± 7.1948
Figure 4	Immobile time (s)	Male control=20	190.4 ± 9.39	Unpaired two-tailed Student's t-test, P=0.0001		Fig. 4J
Forced swim		Male TG=16	103.81 ± 12.11
	Lantency to first give up (s)	Male control=22	39.77 ± 4.81	Unpaired two-tailed Student's t-test, P=0.0041		Fig. 4K
		Male TG=13	67.85 ± 8.63
Figure 4	Sucrose preference (%)	Male control=19	72.02448 ± 3.769	Unpaired two-tailed Student's t-test, P=0.0176		Fig. 4L
Sucrose preference test		Male TG=14	84.54617 ± 2.74835
Body weight	Body weight (g)	Male control=7	22.8043 ± 0.41	Unpaired two-tailed Student's t-test, P=0.94309		Fig. 4-fig. supplement 1A
		Male TG=8	23.6525 ± 0.64
Figure 4-figure spplement 1	PP75	Male control=8	35.60322 ± 7.87603	Unpaired two-tailed Student's t-test, P=0.3313		Fig. 4-fig. supplement 1B
Prepluse inhibition test		Male TG=9	44.77568 ±5.03953
Prepluse inhibition (%)	PP80	Male control=7	38.80779 ± 7.00157	Unpaired two-tailed Student's t-test, P=0.1807		Fig. 4-fig. supplement 1B
		Male TG=10	52.84319± 6.76046
	PP85	Male control=9	39.63206 ± 6.88484	Unpaired two-tailed Student's t-test, P=0.0682		Fig. 4-fig. supplement 1B
		Male TG=10	57.8304 ±6.33941
Figure 4-figure spplement 2	Center distance (cm) traveled	Male control=8	484.975 ±73.05635	Unpaired two-tailed Student's t-test, P=0.20198		Fig. 4-fig. supplement 2A
Open field		Male TG=8	629.45 ± 79.42618
	Center time (s)	Male control=11	60.45455 ± 11.68512	Unpaired two-tailed Student's t-test, P=0.6852		Fig. 4-fig. supplement 2B
		Male TG=11	71.97273 ± 25.4468
