# Supplementary material for: ErbB4 deletion in noradrenergic neurons in the locus coeruleus induces mania-like behavior via elevated catecholamines
Source: eLife. 2018 Sep 4;7:e39907. doi: 10.7554/eLife.39907 (PMC6185106; doi:10.7554/eLife.39907)
Supplement: Figure 5—source data 1. [file elife-39907-fig5-data1.xlsx]

## Sheet: Table S3
Figure 5-Source data 1: Statistical reporting of Figure 5
Assay	Measurement	N	Values (mean±s.e.m.)	Statistical test and P value		Figure
Figure 5	ErbB4 density in LC	Male AAV-GFP=3	1.00 ± 0.01574	Unpaired two-tailed Student's t-test, P=0.0014		Fig. 5B
ErbB4 protein	Normalized	Male AAV-Cre-GFP=3	0.55613± 0.05402
Figure 5	Total distance (cm) traveled	Male GFP=14	5157.55 ± 219.78072	Unpaired two-tailed Student's t-test, P=0.00561		Fig. 5C
Open field		Male AAV-cre=12	6036.20833 ± 177.13822
	Speed (cm/s)	Male GFP=14	8.59592 ± 0.3663	Unpaired two-tailed Student's t-test, P=0.00561		Fig. 5D
		Male AAV-cre=12	10.06035 ± 0.29523
	Distance (cm) traveled with high speed	Male GFP=14	3076.50714 ± 210.23991	Unpaired two-tailed Student's t-test, P=0.00855		Fig. 5E
		Male AAV-cre=12	3900.71667 ± 190.63566
	Duration (s) traveled with high speed	Male GFP=14	161.58571 ± 9.64919	Unpaired two-tailed Student's t-test, P=0.02168		Fig. 5F
		Male AAV-cre=12	193.275 ± 8.2009
	Immobile time (s)	Male GFP=14	123.55 ±10.8687	Unpaired two-tailed Student's t-test, P=0.03463		Fig. 5G
		Male AAV-cre=12	93.48333± 6.98742
Figure 5	Time in open arms (%)	Male GFP=10	100 ± 25.98775	Unpaired two-tailed Student's t-test, P=0.02699		Fig. 5H
elevated plus maze		Male AAV-cre=18	216.5418 ± 33.93326
	Entries into open arms (%)	Male GFP=11	100 ±15.24033	Unpaired two-tailed Student's t-test, P=0.02804		Fig. 5I
		Male AAV-cre=18	152.77766± 15.09475
Figure 5	Immobile time (s)	Male GFP=11	200.09091± 10.04757	Unpaired two-tailed Student's t-test, P=2.38285E-5		Fig. 5J
Forced swim		Male AAV-cre=18	109.88889± 12.36136
	Lantency to first give up (s)	Male GFP=10	32.3 ±5.70584	Unpaired two-tailed Student's t-test, P=0.0118		Fig. 5K
		Male AAV-cre=18	48.83333 ± 3.2832
Figure 5	Sucrose preference (%)	Male GFP=10	64.64065± 4.14509	Unpaired two-tailed Student's t-test, P=0.04082		Fig. 5L
Sucrose preference test		Male AAV-cre=13	74.96066 ± 2.67303
Fig. 5-fig. supplement 3	Total distance (cm) traveled after MHP treatment	Male control Saline=10	4363.53333 ± 224.76866	Unpaired two-tailed Student's t-test, P=0.00126		Fig. 5-fig. supplement 3A
Open field		Male control MHP=11	7650.53535 ± 801.15787
		Male TG Saline=7	5542.63492 ± 316.69149	Unpaired two-tailed Student's t-test, P=0.00282		Fig. 5-fig. supplement 3A
		Male TG MHP=12	8876.16667 ± 862.03374
	Speed (cm/s) after MHP treatment	Male control Saline=10	7.27256 ± 0.37461	Unpaired two-tailed Student's t-test, P=0.00126		Fig. 5-fig. supplement 3B
		Male control MHP=11	12.75089 ± 1.33526
		Male TG Saline=7	9.23772 ± 0.52782	Unpaired two-tailed Student's t-test, P=0.00282		Fig. 5-fig. supplement 3B
		Male TG MHP=12	14.79361 ± 1.43672
	Distance (cm) traveled with high speed after MHP treatment	Male control Saline=10	2403.7 ±210.63456	Unpaired two-tailed Student's t-test, P=0.01659		Fig. 5-fig. supplement 3C
		Male control MHP=7	5642.68687 ± 835.59872
		Male TG Saline=7	3490.46032 ±379.3441	Unpaired two-tailed Student's t-test, P=0.00326		Fig. 5-fig. supplement 3C
		Male TG MHP=12	6924.17593 ± 898.61557
	Duration (s) traveled with high speed after MHP treatment	Male control Saline=10	122.44 ± 9.79029	Unpaired two-tailed Student's t-test, P=0.0011		Fig. 5-fig. supplement 3D
		Male control MHP=11	227.03636 ± 24.32905
		Male TG Saline=7	153.02857 ± 11.12857	Unpaired two-tailed Student's t-test, P=3.65317E-4		Fig. 5-fig. supplement 3D
		Male TG MHP=12	258.29167 ± 20.54422
	Immobile time (s) after MHP treatment	Male control Saline=10	179.61 ± 12.85488	Unpaired two-tailed Student's t-test, P=9.35468E-4		Fig. 5-fig. supplement 3E
		Male control MHP=11	89.65455 ± 18.52154
		Male TG Saline=7	139 ± 8.64074	Unpaired two-tailed Student's t-test, P=0.00121		Fig. 5-fig. supplement 3E
		Male TG MHP=12	73.1± 11.85861
Fig. 5-fig. supplement 4	CREB protein	Control =6	1 ± 0.06062	Unpaired two-tailed Student's t-test, P=0.70512		Fig. 5-fig. supplement 4B
pCREB and CREB protein	Normalized	TG=6	1.03459 ± 0.06492
	pCREB protein	Control =6	1 ± 0.15343	Unpaired two-tailed Student's t-test, P=0.90599		Fig. 5-fig. supplement 4C
	Normalized	TG=6	1.02803 ± 0.17326
