# Supplementary material for: ErbB4 deletion in noradrenergic neurons in the locus coeruleus induces mania-like behavior via elevated catecholamines
Source: eLife. 2018 Sep 4;7:e39907. doi: 10.7554/eLife.39907 (PMC6185106; doi:10.7554/eLife.39907)
Supplement: Figure 6—source data 1. [file elife-39907-fig6-data1.xlsx]

## Sheet: Table S3
Figure 6-Source data 1: Statistical reporting of Figure 6
Assay	Measurement	N	Values (mean±s.e.m.)	Statistical test and P value		Figure
Figure 6	Spontaneous fring frequency	Male GFP=8	2.14375 ± 0.20354	Unpaired two-tailed Student's t-test, P=0.00264		Fig. 6B
Spontaneous activity	Normalized	Male AAV-cre=7	3.61429 ± 0.35591
	Interspike intervel	Male GFP=8		Two-sample Kolmogorov–Smirnov test, P=6.05934E-186		Fig. 6C
	Normalized	Male AAV-cre=7
Figure 6	NR2B	Male GFP=3	1 ± 0.04043	Unpaired two-tailed Student's t-test, P=0.04988		Fig. 6E
NR2B	Normalized	Male AAV-cre=3	1.32879 ± 0.11195
Figure 6	Amplitude of NMDAR current	Male GFP=7	1 ± 0.11201	Unpaired two-tailed Student's t-test, P=0.02274		Fig. 6G
NMDAR current	Normalized	Male AAV-cre=8	4.16356 ± 0.69025
