# Supplementary material for: ErbB4 deletion in noradrenergic neurons in the locus coeruleus induces mania-like behavior via elevated catecholamines
Source: eLife. 2018 Sep 4;7:e39907. doi: 10.7554/eLife.39907 (PMC6185106; doi:10.7554/eLife.39907)
Supplement: Figure 7—source data 1. [file elife-39907-fig7-data1.xlsx]

## Sheet: Table S3
Figure 7-Source data 1: Statistical reporting of Figure 7
Assay	Measurement	N	Values (mean±s.e.m.)	Statistical test and P value	Post hoc test and P value	Figure
Figure 7	Total distance (cm) traveled after lithium treatment	Male control=24	5275.204 ± 151.10	Unpaired two-tailed Student's t-test, P=0.0016		Fig. 7A
Open field		Male control lithium=10	6487.18 ± 248.485
		Male TG =22	6307.123 ± 240.821	Unpaired two-tailed Student's t-test, P=0.04514		Fig. 7A
		Male TG lithium=15	5570.66667 ± 243.259
	Speed (cm/s) after lithium treatment	Male control=24	8.79201 ± 0.25184	Unpaired two-tailed Student's t-test, P=0.0016		Fig. 7B
		Male control lithium=10	10.81197 ± 0.41414
		Male TG =22	10.51187 ± 0.40137	Unpaired two-tailed Student's t-test, P=0.03602		Fig. 7B
		Male TG lithium=13	9.29991 ± 0.47001
	Distance (cm) traveled with high speed after lithium treatment	Male control=14	3384.436 ± 189.483	Unpaired two-tailed Student's t-test, P=0.05598		Fig. 7C
		Male control lithium=6	4025.96667 ± 175.1542
		Male TG =14	4255.35 ± 241.254	Unpaired two-tailed Student's t-test, P=0.00214		Fig. 7C
		Male TG lithium=12	3134.008 ± 211.17
	Duration (s) traveled with high speed after lithium treatment	Male control=17	166.059 ± 8.775	Unpaired two-tailed Student's t-test, P=0.01029		Fig. 7D
		Male control lithium=8	212.525 ± 15.60869
		Male TG =12	209.95 ± 10.81511	Unpaired two-tailed Student's t-test, P=0.02678		Fig. 7D
		Male TG lithium=16	180.319 ± 10.864
	Immobile time (s) after lithium treatment	Male control=28	106.63929 ± 5.43081	Unpaired two-tailed Student's t-test, P=0.00429		Fig. 7E
		Male control lithium=12	75.99167 ± 8.78692
		Male TG =20	73.58 ± 4.837	Unpaired two-tailed Student's t-test, P=0.02245		Fig. 7E
		Male TG lithium=19	91.321 ± 7.528
Figure 7	Time in open arms (%) after lithium treatment	Male control=23	100 ± 7.09573	Unpaired two-tailed Student's t-test, P=0.67224		Fig. 7F
Elevated plus maze		Male control lithium=8	107.0630 ± 11.48336
		Male TG =24	131.8658 ± 9.8313	Unpaired two-tailed Student's t-test, P=0.03835		Fig. 7F
		Male TG lithium=18	104.0769 ± 7.2097
	Entries into open arms (%) after lithium treatment	Male control=23	100 ± 5.7106	Unpaired two-tailed Student's t-test, P=0.95008		Fig. 7G
		Male control lithium=8	100.6645 ± 6.7542
		Male TG =22	128.8398 ±7.1948	Unpaired two-tailed Student's t-test, P=0.00117		Fig. 7G
		Male TG lithium=25	101.2378 ±3.9725
Figure 7	Immobile time (s) after lithium treatment	Male control=20	190.4 ± 9.38627	Unpaired two-tailed Student's t-test, P=0.0047		Fig. 7H
Forced swim		Male control lithium=8	135.25 ± 15.68752
		Male TG =16	103.81 ± 12.11	Unpaired two-tailed Student's t-test, P=2.19008E-6		Fig. 7H
		Male TG lithium=20	178.9 ± 6.78346
	Lantency to first give up (s) after lithium treatment	Male control=22	37.3 ± 4.80707	Unpaired two-tailed Student's t-test, P=0.77563		Fig. 7I
		Male control lithium=10	39.77273 ± 7.12593
		Male TG =13	67.85 ± 8.63	Unpaired two-tailed Student's t-test, P=0.02849		Fig. 7I
		Male TG lithium=16	49.5625 ± 4.54328
Figure 7	Sucrose preference after lithium treatment	Male control=19	72.02448 ± 3.769	Unpaired two-tailed Student's t-test, P=0.34188		Fig. 7J
Sucrose preference test		Male control lithium=12	77.61949 ± 4.16717
		Male TG =13	84.54617 ± 2.74835	Unpaired two-tailed Student's t-test, P=0.01053		Fig. 7J
		Male TG lithium=18	73.53812 ± 3.3393
Fgiure 7	NR2B after lithium treatment	TG =3	1.34518 ± 0.07912	Unpaired two-tailed Student's t-test, P=0.0435		Fig. 7L
LC	Normalized	TG lithium=3	1.09182 ± 0.03604
lithium		control=3	1 ± 0.03712	Unpaired two-tailed Student's t-test, P=0.03193		Fig. 7L
		control lithium=3	1.28718 ± 0.08074
	TH-Ser40/TH after lithium treatment	TG =4	1.2931 ± 0.06739	Unpaired two-tailed Student's t-test, P=0.0069		Fig. 7L
	Normalized	TG lithium=4	0.89052 ± 0.04117
		control=4	1.00±0.05678	Unpaired two-tailed Student's t-test, P=0.2713		Fig. 7L
		control lithium=4	1.06489±0.02168
	TH after lithium treatment	TG =4	1.08122 ± 0.05902	Unpaired two-tailed Student's t-test, P=0.8907		Fig. 7L
	Normalized	TG lithium=4	0.97072 ± 0.03923
		control=4	1.00±0.07725	Unpaired two-tailed Student's t-test, P=0.43542		Fig. 7L
		control lithium=4	0.95574±0.08313
	s-COMT after lithium treatment	TG =4	0.96183 ± 0.12893	Unpaired two-tailed Student's t-test, P=0.2928		Fig. 7L
	Normalized	TG lithium=4	0.80322 ± 0.07494
		control=4	1.00±0.09111	Unpaired two-tailed Student's t-test, P=0.817		Fig. 7L
		control lithium=4	0.97312±0.06688
	MB-COMT after lithium treatment	TG =4	0.94165 ± 0.12736	Unpaired two-tailed Student's t-test, P=0.8293		Fig. 7L
	Normalized	TG lithium=4	1.0048 ± 0.14195
		control=4	1.00±0.02261	Unpaired two-tailed Student's t-test, P=0.6753		Fig. 7L
		control lithium=4	1.05281±0.15304
Figure 7	Spontaneous fring frequency	Male TG =11	3.04609 ± 0.26031	Unpaired two-tailed Student's t-test, P=0.0013		Fig. 7M
Spontaneous activity	after lithium treatment	Male TG lithium=15	2.1026 ± 0.11509
Lithium		control=13	2.0601 ± 0.2585	Unpaired two-tailed Student's t-test, P=0.14235		Fig. 7M
		control lithium=18	1.94792± 0.14937
	Interspike intervel	Male TG =11		Two-sample Kolmogorov–Smirnov test, P=0		Fig. 7N
	after lithium treatment	Male TG lithium=15
		control=13		Two-sample Kolmogorov–Smirnov test, P=1.04722E-40		Fig. 7N
		control lithium=18
