# Supplementary material for: ErbB4 deletion in noradrenergic neurons in the locus coeruleus induces mania-like behavior via elevated catecholamines
Source: eLife. 2018 Sep 4;7:e39907. doi: 10.7554/eLife.39907 (PMC6185106; doi:10.7554/eLife.39907)
Supplement: Figure 8—source data 1. [file elife-39907-fig8-data1.xlsx]

## Sheet: Table S3
Figure 8-Source data 1: Statistical reporting of Figure 8
Assay	Measurement	N	Values (mean±s.e.m.)	Statistical test and P value	Post hoc test and P value	Figure
Figure 8	Total distance (cm) traveled after drug treatment	Male control=17	5049.57059 ±208.69758	One-way ANOVA, P>F=0.00014.97437E-7	Tukey's multiple comparison test,	Fig. 8A
Open field		Male control prazosin=12	2193 ± 279.87489		control saline vs. control prazosin, P=4.16208E-10
		Male control SCH23390=11	1686.87273 ± 220.27473		control saline vs. control SCH23390, P=1.1201E-11
		Male TG saline=11	6259.29091 ± 235.2659		control saline vs. TG saline, P=8.62352E-4
		Male TG prazosin=10	4480.92 ± 295.694		TG saline vs. TG prazosin, P=0.00105
		Male TG SCH23390=9	3033.0777 ± 426.5837		TG saline vs. TG SCH23390, P=2.69445E-7
	Speed (cm/s) after drug treatment	Male control=17	8.41595 ± 0.34783	One-way ANOVA, P>F=4.97437E-7	Tukey's multiple comparison test,	Fig. 8B
		Male control prazosin=11	3.46979 ± 0.46897		control saline vs. control prazosin, P=4.16208E-10
		Male control SCH23390=10	2.69838 ± 0.38614		control saline vs. control SCH23390, P=1.1201E-11
		Male TG saline=11	10.43215 ± 0.39211		control saline vs. TG saline, P=8.62352E-4
		Male TG prazosin=10	7.4682 ± 0.49282		TG saline vs. TG prazosin, P=0.00105
		Male TG SCH23390=9	5.05513 ± 0.71097		TG saline vs. TG SCH23390, P=2.69445E-7
	Distance (cm) traveled with high speed after drug treatment	Male control=11	3277.75455 ±131.77532	One-way ANOVA, P>F=5.97979E-8	Tukey's multiple comparison test,	Fig. 8C
		Male control prazosin=12	794.6 ± 176.19438		control saline vs. control prazosin, P=5.33799E-13
		Male control SCH23390=11	415.29091 ± 105.49986		control saline vs. control SCH23390, P=2.20005E-14
		Male TG saline=10	4159.21 ± 235.6449		control saline vs. TG saline, P=0.0034
		Male TG prazosin=10	2388.67 ± 242.9527		TG saline vs. TG prazosin, P=1.41135E-4
		Male TG SCH23390=9	1106.56667 ± 311.119		TG saline vs. TG SCH23390, P=2.14416E-8
	Duration (s) traveled with high speed after drug treatment	Male control=14	163.82143 ± 6.33845	One-way ANOVA, P>F=2.91299E-7	Tukey's multiple comparison test,	Fig. 8D
		Male control prazosin=12	48.04167 ± 10.20761		control saline vs. control prazosin, P=3.23025E-12
		Male control SCH23390=11	23.21818 ± 5.62447		control saline vs. control SCH23390, P=2.9294E-14
		Male TG saline=12	199.51667 ± 10.9255		control saline vs. TG saline, P=0.00738
		Male TG prazosin=10	133.79 ± 11.79527		TG saline vs. TG prazosin, P=0.00278
		Male TG SCH23390=9	64.43333 ± 16.9014		TG saline vs. TG SCH23390, P=1.07817E-7
	Immobile time (s) after drug treatment	Male control=15	101.72667 ± 6.92392	One-way ANOVA, P>F=1.62949E-7	Tukey's multiple comparison test,	Fig. 8E
		Male control prazosin=12	293.13333 ± 29.21071		control saline vs. control prazosin, P=4.99427E-7
		Male control SCH23390=11	329.48182 ± 26.82402		control saline vs. control SCH23390, P=2.23369E-8
		Male TG saline=13	77.69286 ±5.3557		control saline vs. TG saline, P=0.0037
		Male TG prazosin=9	153.05556 ± 20.89714		TG saline vs. TG prazosin, P=0.03915
		Male TG SCH23390=13	268.33077 ± 27.69733		TG saline vs. TG SCH23390, P=6.03201E-8
Figure 8	Time in open arms (%) after drug treatment	Male control=7	23.50667 ± 2.56846	One-way ANOVA, P>F=1.74338E-4	Tukey's multiple comparison test,	Fig. 8F
elevated plus maze		Male control prazosin=10	5.08 ± 2.19482		control saline vs. control prazosin, P=0.00359
		Male control SCH23390=10	7.87889 ± 4.10204		control saline vs. control SCH23390, P=0.014
		Male TG saline=10	100 ± 7.34447		control saline vs. TG saline, P=0.04563
		Male TG prazosin=12	51.97418 ± 10.13189		TG saline vs. TG prazosin, P=0.0023
		Male TG SCH23390=7	32.48255 ±10.32868		TG saline vs. TG SCH23390, P=2.63708E-4
	Entries into open arms (%) after drug treatment	Male control=11	36.90091 ± 1.91388	One-way ANOVA, P>F=0.35775	Tukey's multiple comparison test,	Fig. 8G
		Male control prazosin=12	20.06253 ± 4.83221		control saline vs. control prazosin, P=0.06665
		Male control SCH23390=11	31.62705 ± 8.13299		control saline vs. control SCH23390, P=1
		Male TG saline=14	100 ± 4.35882		control saline vs. TG saline, P=0.00301
		Male TG prazosin=11	90.6097 ±6.93669		TG saline vs. TG prazosin, P=0.42598
		Male TG SCH23390=8	101.31977 ± 5.08198		TG saline vs. TG SCH23390, P=0.98573
Figure 8	Immobile time (s) after drug treatment	Male control=14	208.64286 ± 8.76532	One-way ANOVA, P>F=4.1257E-6	Tukey's multiple comparison test,	Fig. 8H
Forced swim		Male control prazosin=7	193.77778 ± 25.74381		control saline vs. control prazosin, P=0.05108
		Male control SCH23390=10	290.4 ± 10.68457		control saline vs. control SCH23390, P=5.76903E-8
		Male TG saline=16	123.75 ± 8.81972		control saline vs. TG saline, P=2.22954E-7
		Male TG prazosin=12	183.75 ± 15.74519		TG saline vs. TG prazosin, P=0.00344
		Male TG SCH23390=12	223.833 ± 13.2389		TG saline vs. TG SCH23390, P=3.01936E-6
	Lantency to first give up (s) after drug treatment	Male control=12	39.5 ± 6.14534	One-way ANOVA, P>F=7.23256E-6	Tukey's multiple comparison test,	Fig. 8I
		Male control prazosin=10	25.5 ± 5.83904		control saline vs. control prazosin, P=0.29635
		Male control SCH23390=10	17.1 ± 7.71499		control saline vs. control SCH23390, P=0.05415
		Male TG saline=13	67.92308 ± 2.64687		control saline vs. TG saline, P=0.00112
		Male TG prazosin=12	45.72727 ± 5.52365		TG saline vs. TG prazosin, P=0.00168
		Male TG SCH23390=12	35.08333 ± 4.14411		TG saline vs. TG SCH23390, P=5.89196E-6
Figure 8	Sucrose preference after drug treatment	Male control=11	60.20409 ± 3.9167	One-way ANOVA, P>F=4.03439E-4	Tukey's multiple comparison test,	Fig. 8J
Sucrose preference test		Male control prazosin=9	49.39204 ± 3.53894		control saline vs. control prazosin, P=0.10868
		Male control SCH23390=10	54.30858 ± 3.25405		control saline vs. control SCH23390, P=0.47612
		Male TG saline=11	78.93867 ± 3.06273		control saline vs. TG saline, P=0.00121
		Male TG prazosin=12	52.14678 ± 5.62181		TG saline vs. TG prazosin, P=9.1364E-4
		Male TG SCH23390=12	53.75253 ± 4.69527		TG saline vs. TG SCH23390, P=0.00178
